# Supplementary material for: Characterizing lead-rich particles in Beijing's atmosphere following coal-to-gas conversion: Insights from single particle aerosol mass spectrometry
Source: Copernicus journal article supplement (doi:10.5194/egusphere-2024-3469), 2025-01-27
Supplement: Supplementary file 1 [file egusphere-2024-3469-supplement.pdf]

## *Supplement of*

# **Characterizing lead-rich particles in Beijing's atmosphere following coal-to-gas conversion: Insights from single particle aerosol mass spectrometry**

5 Xiufeng Lian<sup>1, 2</sup>, Yongjiang Xu<sup>1</sup>, Fengxian Liu<sup>3</sup>, Long Peng<sup>4</sup>, Xiaodong Hu<sup>5</sup>, Guigang Tang<sup>6</sup>, Xu Dao<sup>6</sup>,  
Hui Guo<sup>7</sup>, Liwei Wang<sup>8</sup>, Bo Huang<sup>2</sup>, Chunlei Cheng<sup>1</sup>, Lei Li<sup>1</sup>, Guohua Zhang<sup>9</sup>, Xinhui Bi<sup>9</sup>, Xiaofei  
Wang<sup>10</sup>, Zhen Zhou<sup>1</sup>, Mei Li<sup>1,\*</sup>

10 <sup>1</sup> College of Environment and Climate, Institute of Mass Spectrometry and Atmospheric Environment, Guangdong  
Provincial Engineering Research Center for On-line Source Apportionment System of Air Pollution, Jinan University,  
Guangzhou , 510632 PR China

<sup>2</sup> Guangzhou Hexin Instrument Co., Ltd., Guangzhou 510530, Guangdong, China

<sup>3</sup> Taiyuan University of Technology, Taiyuan 030024, PR China

<sup>4</sup> College of Ecology and Environment, Xin Jiang University, Urumqi 830046, PR China

15 <sup>5</sup> Jiangmen Laboratory of Carbon Science and Technology, Hong Kong University of Science and Technology (Guangzhou),  
Jiangmen 529100, PR China

<sup>6</sup> China National Environmental Monitoring Centre, Beijing 100012, PR China

<sup>7</sup> Hunan Province Environmental Monitoring Center, Changsha 410014, PR China

<sup>8</sup> Environment Emergency Monitoring and Accident Investigation Center, Jiaxing 314000, PR China

20 <sup>9</sup> State Key Laboratory of Organic Geochemistry and Guangdong Provincial Key Laboratory of Environmental Protection and  
Resources Utilization, Guangzhou Institute of Geochemistry, Chinese Academy of Sciences, Guangzhou 510640, PR China

<sup>10</sup> Department of Environmental Science and Engineering, Shanghai Key Laboratory of Atmospheric Particle Pollution and  
Prevention, Fudan University, Shanghai 200433, China

*Correspondence to:* [limei@jnu.edu.cn](mailto:limei@jnu.edu.cn)

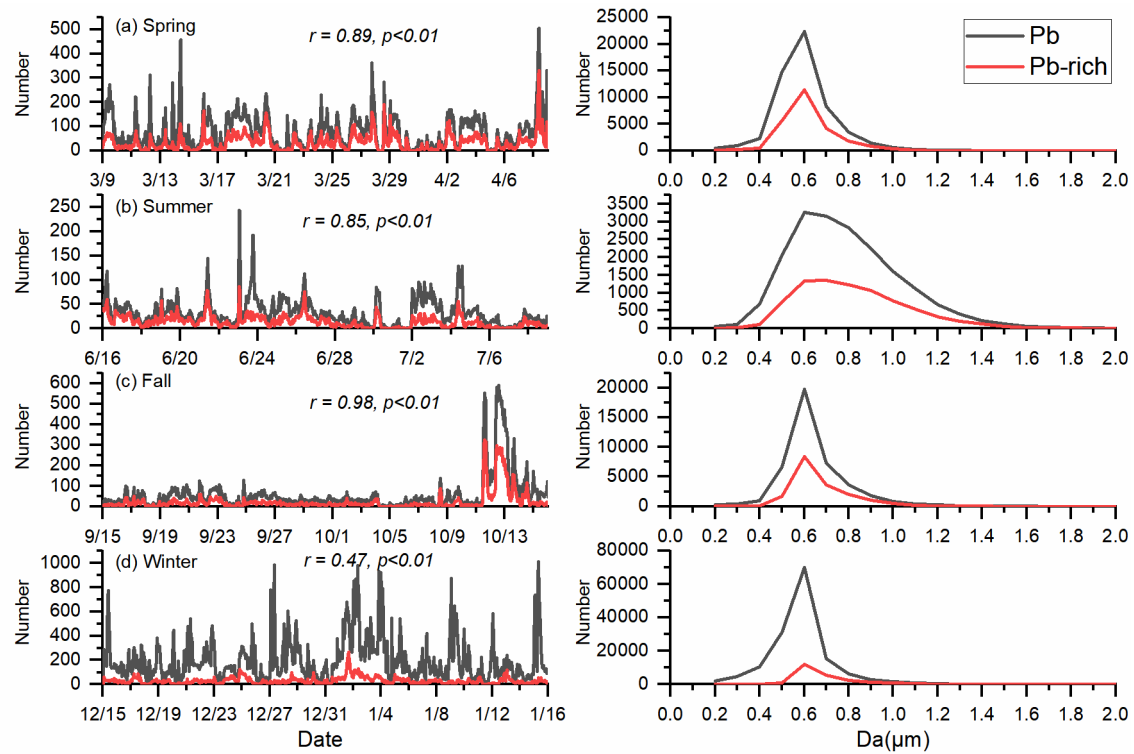

**Figure S1. Time series and size distribution of Pb-containing particles and Pb-rich particles**

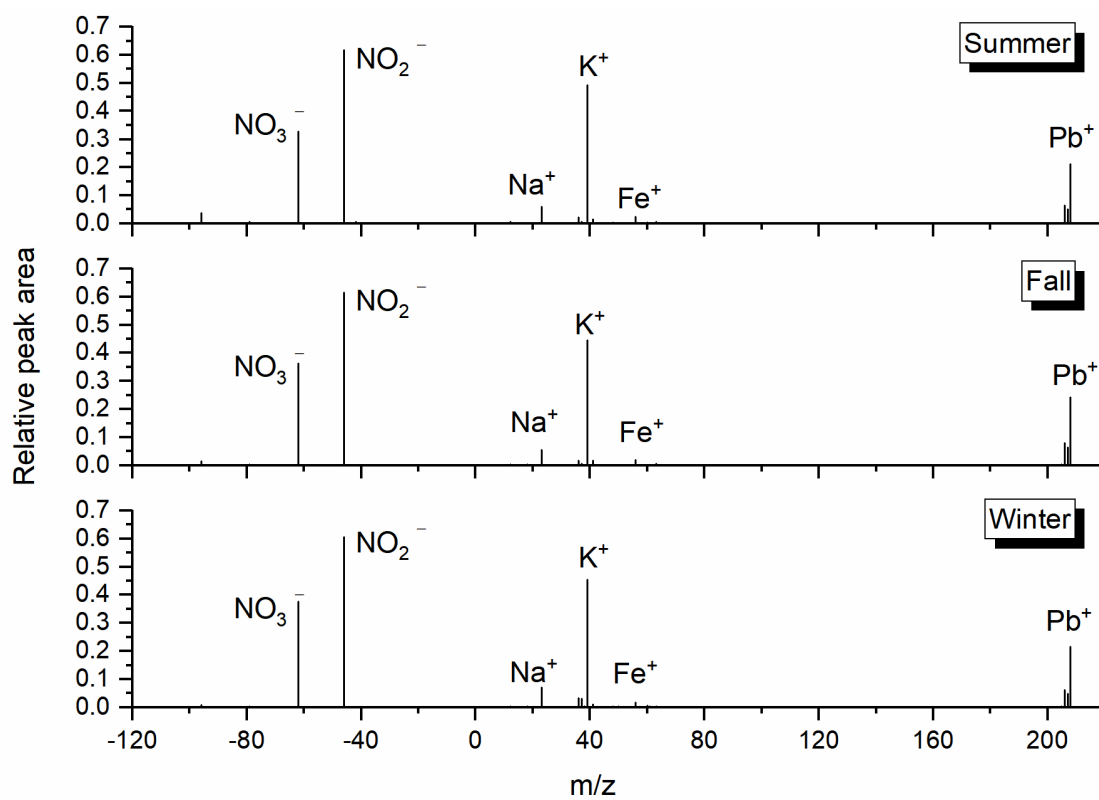

Figure S2. The average mass spectrum of Pb-N particles from summer to winter in 2019.

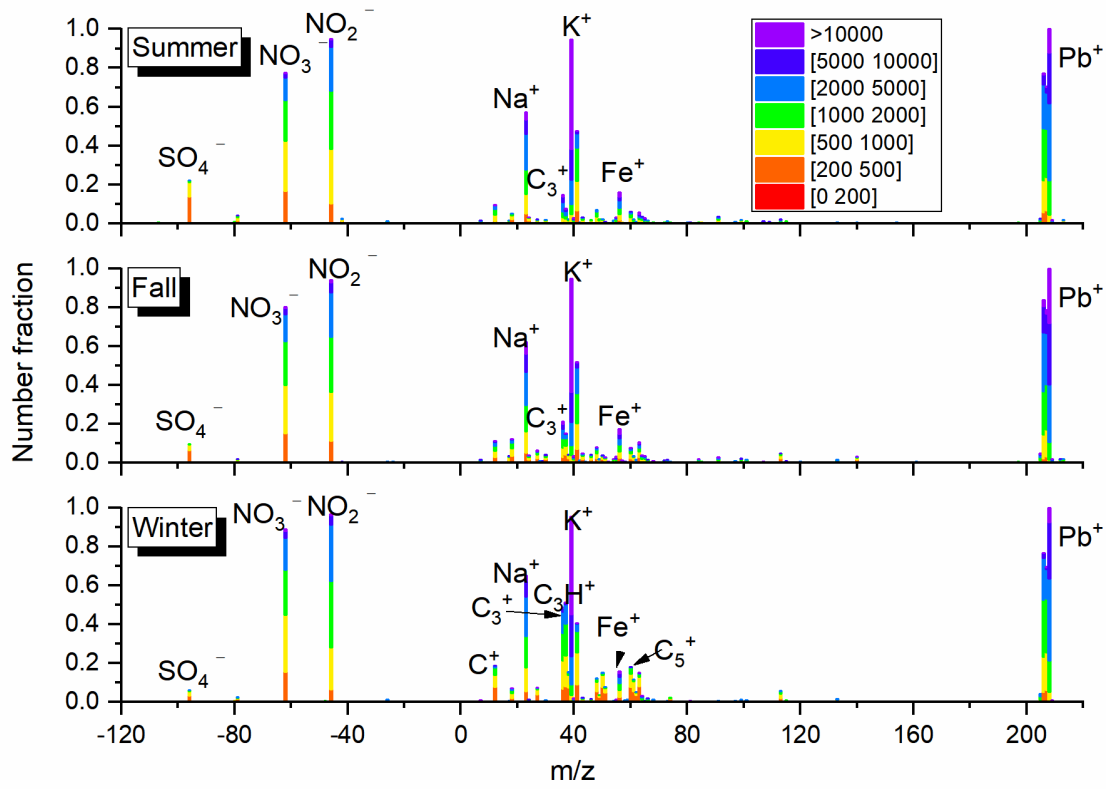

30

Figure S3. The digital spectrum of Pb-N particles from summer to winter in 2019.

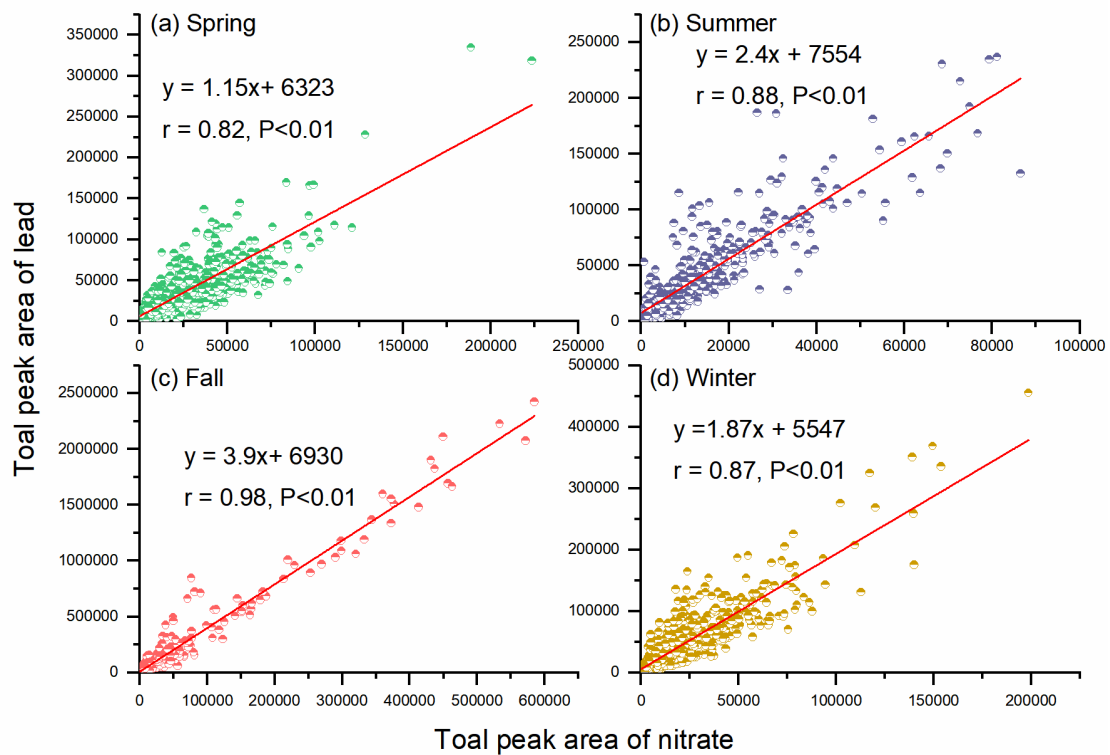

Figure S4. Correlation between the total peak area of nitrate (sum peak area of  $m/z$  -46 and -62) and the total peak area of lead (sum peak area of  $m/z$  206, 207, and 208) in Pb-N particles.

35

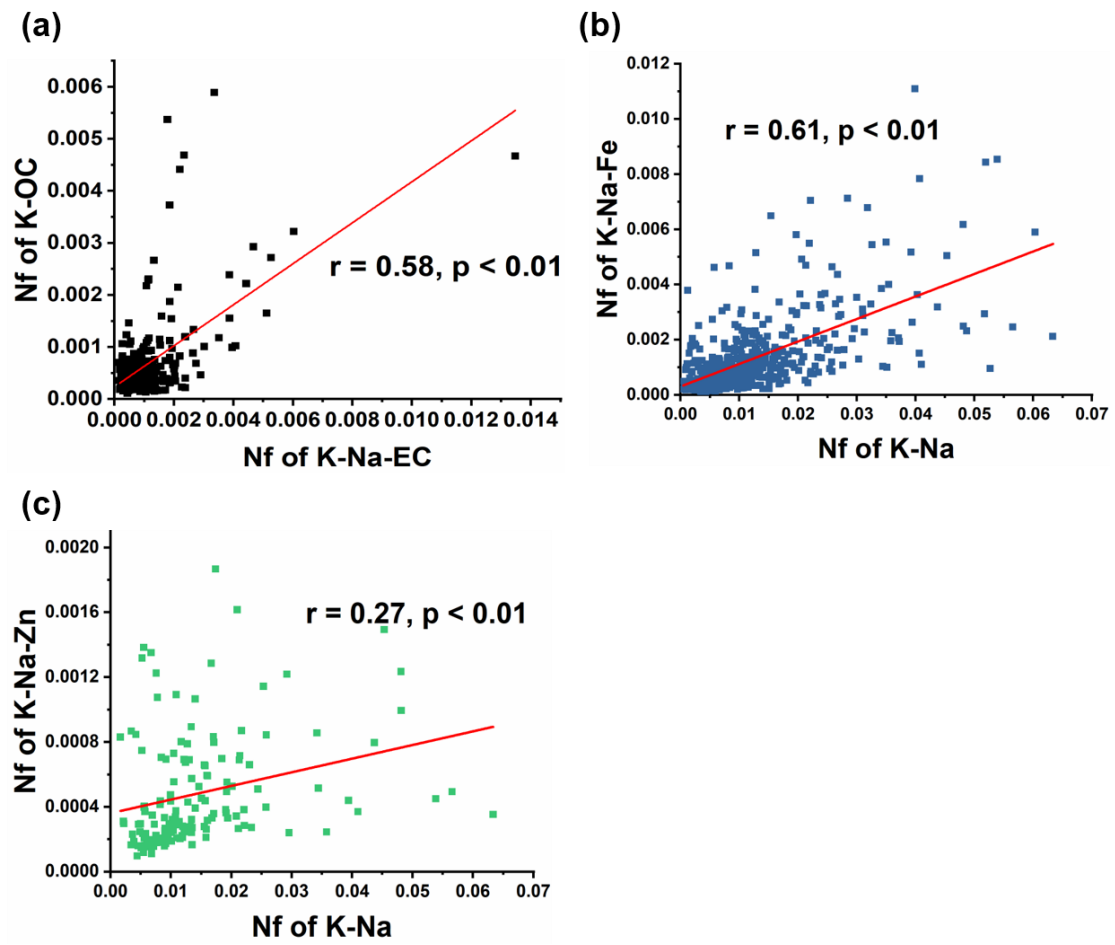

Figure S5. Correlation between the number fractions of K-Na-EC and KOC particles (a), K-Na and K-Na-Fe particles (b), K-Na and K-Na-Zn particles (c).

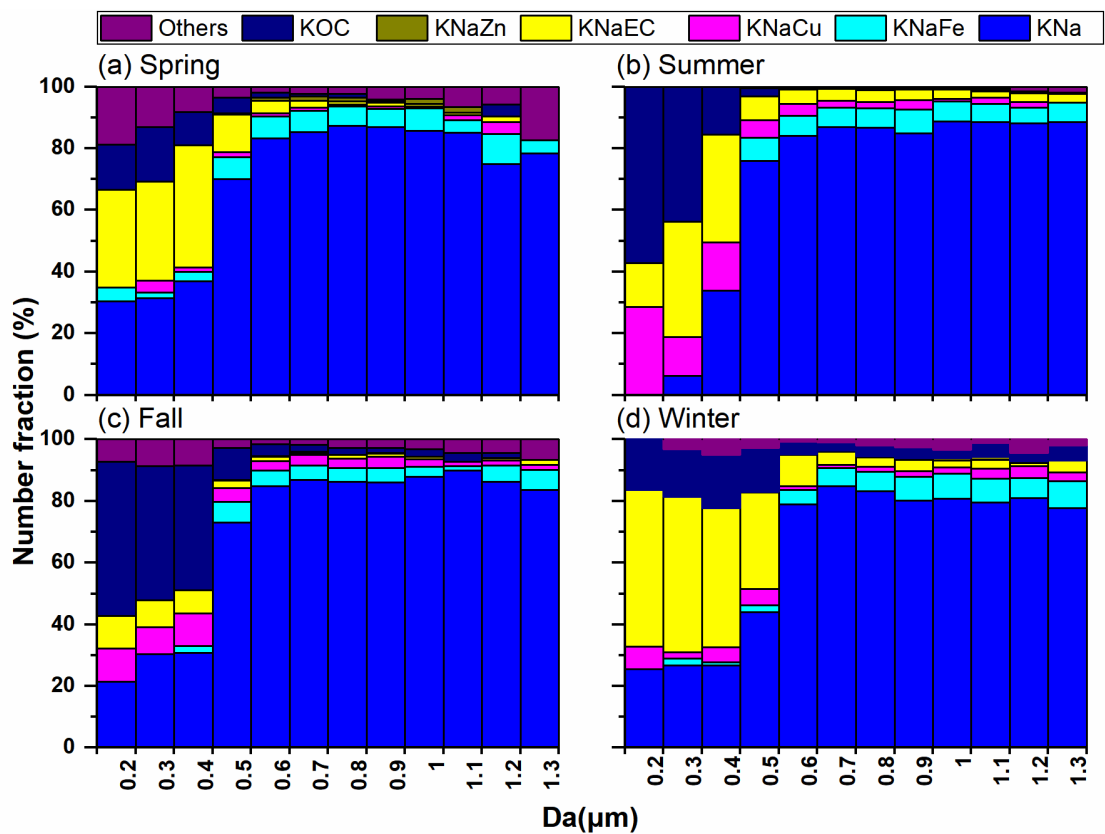

40

Figure S6. Number fractions for size distribution of the main Pb-rich particle types classified based on positive spectrum from spring to winter, respectively.

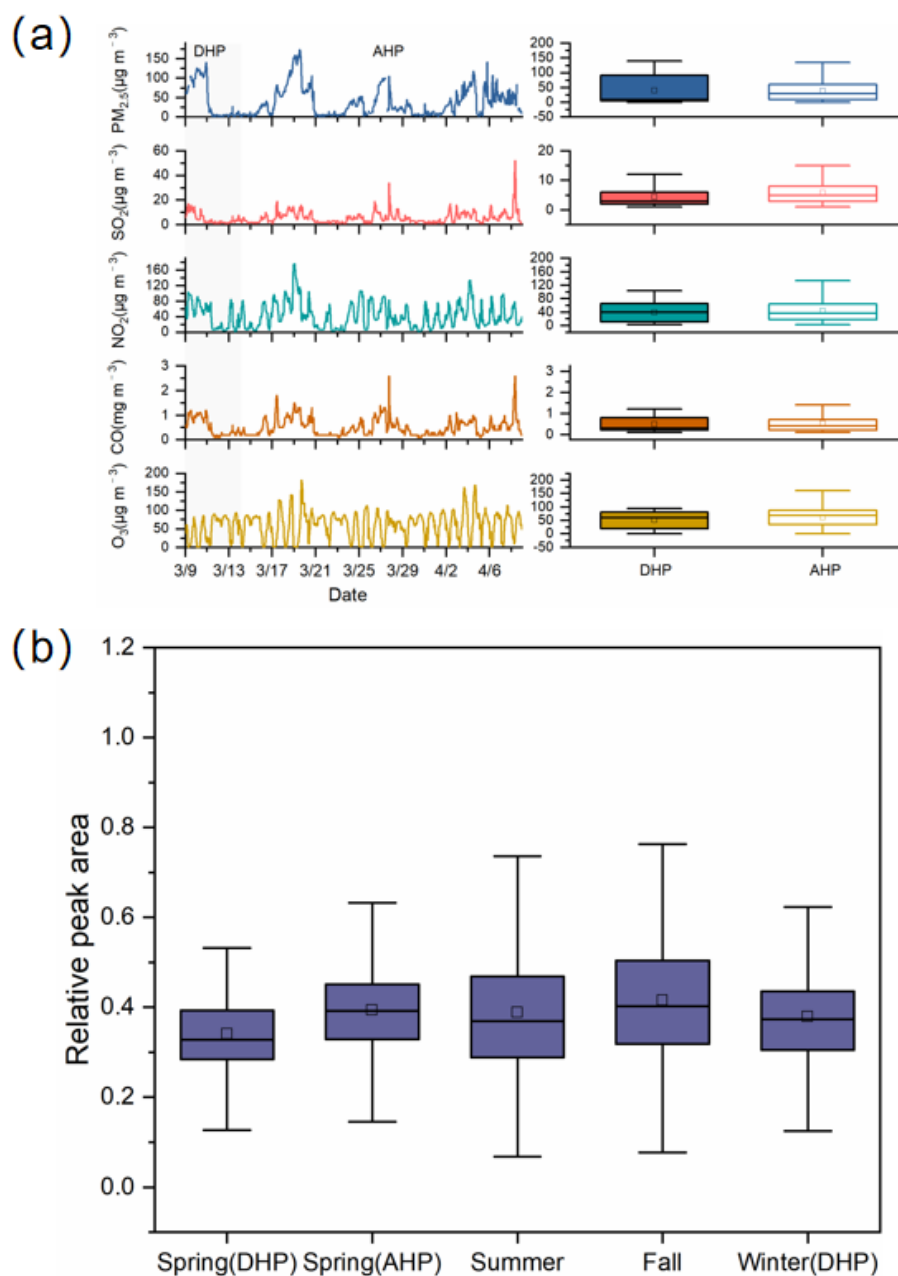

45 **Figure S7.** (a) Time series of pollutant concentrations ( $\text{PM}_{2.5}$ ,  $\text{NO}_2$ ,  $\text{SO}_2$ ,  $\text{CO}$ , and  $\text{O}_3$ ) and box plots of pollutant concentrations during heating (DHP) and non-heating (AHP) periods during spring; (b) The relative peak area of Pb in Pb-rich particles during four seasons.



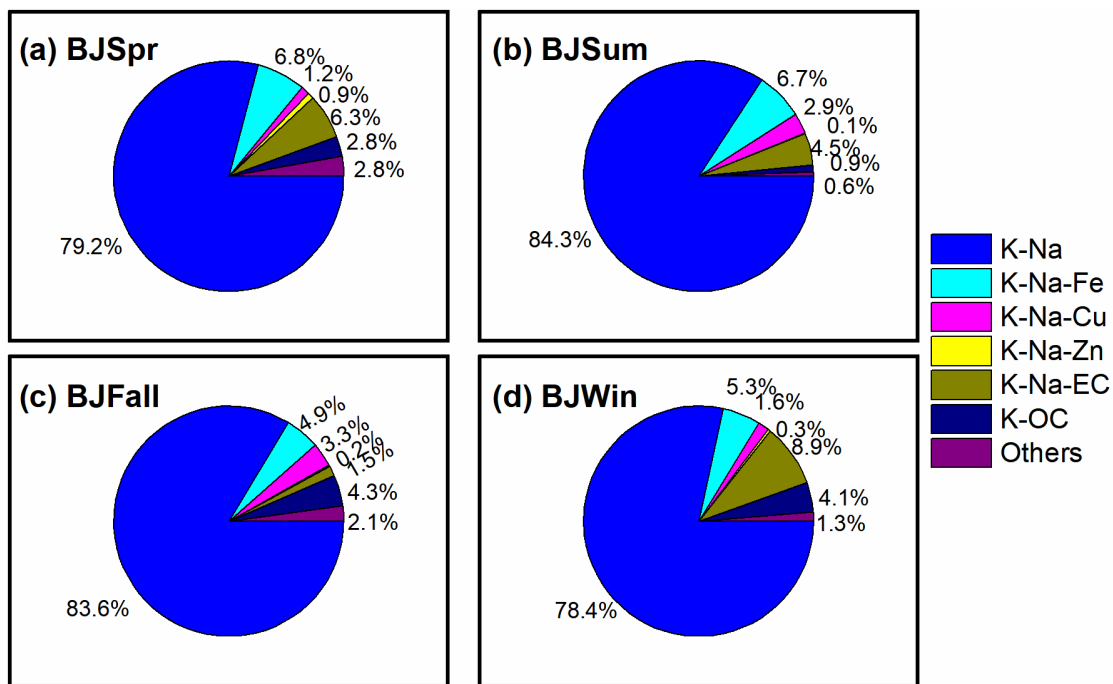

50 Figure S8. The number fractions of the main Pb-rich particle types from spring to winter in 2019.

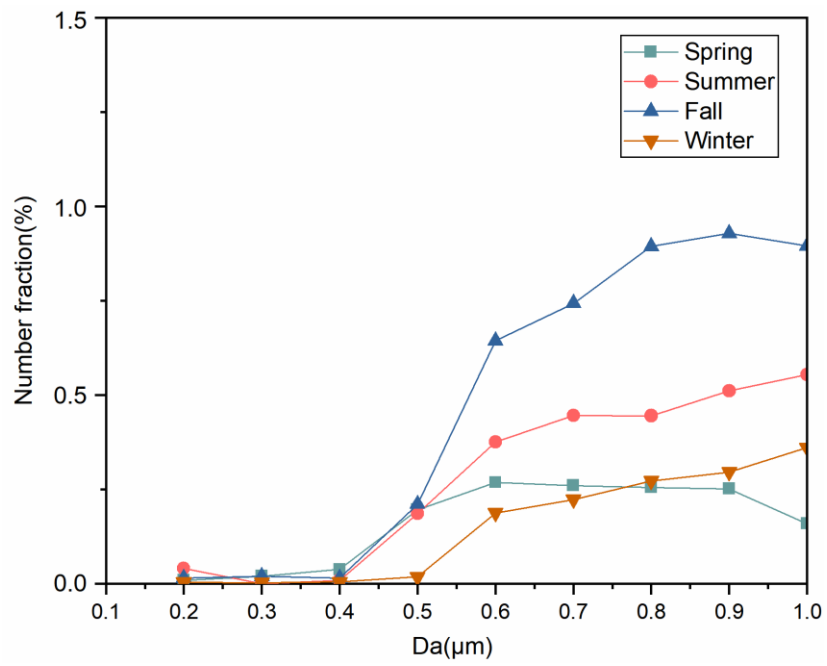

Figure S9. Number fractions for size distribution of Pb-N particles from spring to winter, respectively.

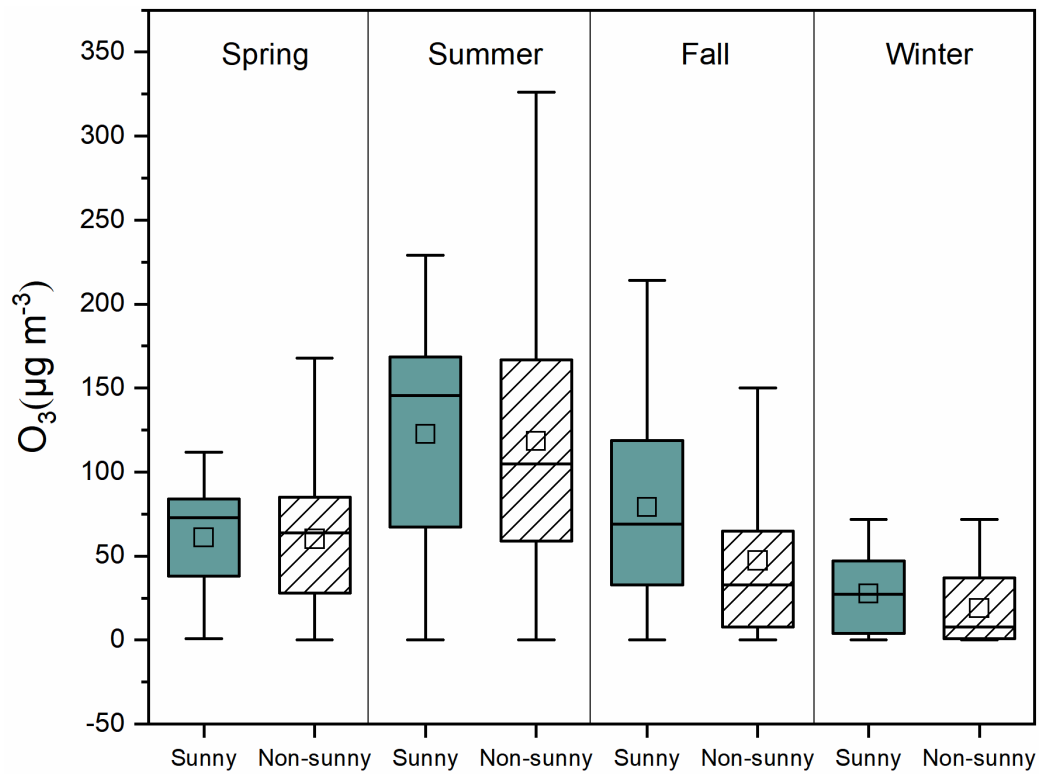

Figure S10. The ozone concentration on sunny and non-sunny days during four seasons.

**Table S1 Average value and standard deviation of meteorological parameters and the concentration of pollutants during sampling periods.**

| Site | Date                    | SO <sub>2</sub>      | NO <sub>2</sub> | O <sub>3</sub> | PM <sub>2.5</sub> | T      | RH      | WS    |
|------|-------------------------|----------------------|-----------------|----------------|-------------------|--------|---------|-------|
|      |                         | (μg/m <sup>3</sup> ) |                 |                |                   | (°C)   | (%)     | (m/s) |
|      | 9 Mar-8 Apr 2019        | 6 ± 5                | 45 ± 32         | 62 ± 37        | 41 ± 37           | 12 ± 5 | 29 ± 14 | 2 ± 2 |
|      | 16 Jun-17 Jul 2019      | 4 ± 3                | 32 ± 19         | 119 ± 75       | 33 ± 21           | 27 ± 5 | 56 ± 19 | 2 ± 1 |
|      | 15 Sep-16 Oct 2019      | 4 ± 4                | 41 ± 22         | 59 ± 56        | 35 ± 26           | 19 ± 6 | 61 ± 21 | 1 ± 1 |
|      | 15 Dec 2019-15 Jan 2020 | 6 ± 5                | 49 ± 30         | 24 ± 23        | 36 ± 32           | -1 ± 3 | 49 ± 20 | 2 ± 1 |
